1 Retrospective Analyses of Interventions to Epidemics using a Continuously Updated Model, with  
2 Application to the COVID-19 Crisis in New York City

3  
4 (under review, Risk Analysis Journal)

5  
6 Jenna Osborn, Shayna Berman, Sara Bender-Bier, Gavin D’Souza, Matthew Myers  
7 Division of Applied Mechanics  
8 U. S. FDA/CDRH  
9 Silver Spring, Maryland  
10 Corresponding author: Matthew Myers, [matthew.myers@fda.hhs.gov](mailto:matthew.myers@fda.hhs.gov)

11  
12  
13 **Abstract**

14 Retrospective analyses of interventions to epidemics, in which the effectiveness of strategies  
15 implemented are compared to hypothetical alternatives, are valuable for performing the cost-  
16 benefit calculations necessary to optimize infection countermeasures. SIR (susceptible-infected-  
17 removed) models are useful in this regard but are limited by the challenge of deciding how and  
18 when to update the numerous parameters as the epidemic progresses. We present a method that  
19 uses a “dynamic spread function” to systematically capture the continuous variation in the  
20 population behavior throughout an epidemic. There is no need to update parameters as the effects  
21 of interventions are gradually manifested in the infection dynamics. We use the tool to quantify  
22 the reduction in infection rate realizable from the population of New York City adopting different  
23 facemask strategies during COVID-19. Assuming a baseline facemask of 67% filtration  
24 efficiency, calculations show that increasing the efficiency to 75% could reduced the roughly 5000  
25 new infections per day occurring at the peak of the epidemic by about 40%. The turn-around time  
26 for the epidemic decreases from around 37 days to 31 days. Mitigation strategies that may not be  
27 varied as part of the retrospective analysis, such as social distancing, are automatically captured as  
28 part of the calibration of the dynamic spread function.

29 Key words: COVID-19, SIR model, Infection-spread model, personal protective equipment,  
30 facemask  
31

## 32 **1.Introduction**

33 Retrospective analyses of strategies used to contain epidemics such as COVID-19 are valuable for  
34 countering second waves of the infection, selecting countermeasures for future epidemics, and  
35 educating the population regarding the efficacy of implementing certain behavior modifications.  
36 In particular, public-health agencies responsible for recommending types of personal protective  
37 equipment (PPE) to stockpile in anticipation of a future pandemic can benefit greatly from the  
38 cost-benefit information yielded by retrospective analyses. Mathematical models, including those  
39 of the SIR type, can be helpful in providing a quantitative framework for the analysis. SIR models  
40 have been applied during the COVID-19 pandemic (Stutt et al. 2020, Giordano et al. 2020,  
41 Bertozzi et al. 2020, Cooper et al. 2020), primarily in a predictive capacity. To our knowledge, no  
42 studies have attempted to re-create an actual scenario (e.g. CNYC) with different interventions,  
43 though in Cooper et al. (2020) the influence of different mask types on the reproduction number  
44 was computed using a generic infection scenario. A formidable challenge in applying SIR models  
45 is prescribing the values of the numerous parameters, and updating them to simulate changing  
46 infection dynamics, e.g. in response to interventions. The challenge is accentuated by the high  
47 sensitivity of the predictions to some of the parameter values (Giordano et al. 2020). Often,  
48 parameter choices are based upon best guesses, or closeness of fit (sometimes visual) of computed  
49 profiles with published curves (Cooper et al. 2020). In this paper we introduce a modification of  
50 traditional SIR models that incorporates a “dynamic spread” function that captures changes in  
51 population behavior in a continuous manner. There is no need to adjust parameters as  
52 interventions are implemented during the course of the infection. The spread function is calibrated  
53 using published infection curves for a specific epidemic, then modified to analyze the effect of  
54 alternate intervention strategies. We illustrate the process using the COVID-19 crisis in New

55 York City (CNYC). The reduction in infection rate realizable in CNYC with an increased level of  
56 mask usage, and with deployment of masks offering higher levels of filtration, is estimated.

## 57 **2. Methods**

58 We illustrate the technique using a 3-equation SIR model. It assumes that the infection dynamics  
59 are dominated by one transmission mode (e.g. airborne particulates), and that the parameter values  
60 are appropriate for all particle sizes contributing to that mode (though interpretation of the  
61 resulting equations as an average for a broad particle distribution is possible (Myers et al. 2016)).  
62 More complicated SIR models can be useful, particularly if it is desired to model the details of the  
63 infection dynamic, e.g. symptomatic and asymptomatic individuals (Stutt et al. 2020). Our  
64 intention is to use the simplest model that can capture the known infection dynamics in a general  
65 sense. As noted by Siegenfeld et al. (2020), simpler models can prove more useful than complex  
66 ones, in part because accurate data is often not available to inform complicated formulations. We  
67 also note that much of the technique we present can be extended to more complex models.

### 68 **2.1 Overview of Strategy.**

69 The dynamic-spread function is part of a systematic procedure for calibrating SIR models. The 5  
70 steps in the procedure are listed below and implemented subsequently.

71 1) Use the rate of change (measured by the number of new infections per day),  $dS/dt$ , of the  
72 susceptible population, as the variable for calibrating the model, rather than  $S$ . The derivative  
73 profile, which we call  $T(t)$ , was felt to be the quantity known most accurately. Its determination  
74 does not require the number of recovered patients to be tracked.

75 2) Normalize variables and identify critical dimensionless parameters. Formulating the model in  
76 terms of dimensionless quantities reduces the number of property values that must be determined,  
77 which can be numerous in SIR models (Stilianakis and Yannis Drossinos 2010).

78 3) Allow the dimensionless parameter  $\delta$ , which is essentially the product of the infection  
79 transmission rate and the virus production rate, to vary with time, and account for its time  
80 dependence in the governing differential for  $T(t)$ . We denote  $\delta(t)$  the “dynamic-spread”  
81 function, as it contains the elements that both vary with time and govern the rate of spread of the  
82 infection.

83 4) Derive the governing equation for  $\delta(t)$ . Provide the required coefficient functions using  
84 published  $T(t)$  profiles for a given infection scenario.

85 5) Designate as the time origin for the dynamic analysis the point of the first intervention into the  
86 epidemic. For CNYC, we identify this as day 17, when shelter-in-place was instituted. Prior to  
87 that point, it is assumed that  $\delta$  is constant in time, and a standard SIR model applies. The  
88 parameters for the standard SIR model can be estimated from the published growth rate and  
89 reproduction number. The resulting values serve as initial conditions for the dynamic analysis.

## 90 **2.2 Development of Governing Equations**

91 The SIR equations under these conditions listed in sections 2 and 2.1 are (Stilianakis and  
92 Drossinos 2010, Myers et al. 2016) as follows. The primes denote dimensional quantities and will  
93 be dropped following nondimensionalization.

$$94 \quad T' = \frac{dS'}{dt'} = -\tilde{\beta} D' \frac{S'}{N} \quad (1a)$$

$$95 \quad \frac{dI'}{dt'} = -\frac{dS'}{dt'} - \mu_I I' \quad (1b)$$

$$96 \quad \frac{dD'}{dt'} = \kappa I' - \frac{1}{\nu} D' \quad (1c)$$

97 Here  $S'$  is the number of susceptible individuals in the total population  $N$ ,  $I'$  the number of  
98 infected individuals,  $D'$  the total number of droplets,  $\tilde{\beta}$  the transmission rate,  $\mu_I$  the infection  
99 recovery rate,  $\kappa$  the droplet production rate, and  $\nu^{-1}$  the droplet removal rate. We next introduce  
100 the maximum number of newly reported infections (roughly 5000 per day for CNYC)  $\alpha$ , and a  
101 time scale  $\Delta$ , which we take to be the turn-around time (time required to reach  $dT'/dt' = 0$ , about  
102 37 days for CNYC.) The function  $T'$  is scaled by  $\alpha$ ,  $I'$  by  $\alpha\Delta$ , and  $D'$  by  $\kappa\alpha\Delta^2$ . Additionally, we  
103 differentiate Eq. 1a (after nondimensionalization), allowing the spread parameter

$$104 \quad \delta = \tilde{\beta} \kappa \Delta^2 \quad (1d)$$

105 to vary with time. Also, for huge populations as in CNYC, we ignore terms proportional  
106  $\alpha\Delta/N$ , including  $S'/N - I$ . Under these assumptions, the SIR equations become:

$$107 \quad T = -\delta D, \quad \frac{dT}{dt} = \frac{T}{\delta} \frac{d\delta}{dt} - \delta \frac{dD}{dt} \quad (2a,b)$$

$$108 \quad \frac{dI}{dt} = -T - \gamma I \quad (2c)$$

$$109 \quad \frac{dD}{dt} = I - \lambda D, \quad (2d)$$

110 where  $\gamma = \Delta\mu_I$  is the dimensionless infection recovery rate and  $\lambda = \frac{\Delta}{v}$  is the dimensionless  
111 droplet decay rate. Inserting (2d) in (2b) and using (2a) yields the 2-equation system:

$$112 \quad \frac{dT}{dt} = -\delta I - \lambda T + \frac{T}{\delta} \frac{d\delta}{dt} \quad (3a)$$

$$113 \quad \frac{dI}{dt} = -T - \gamma I \quad (3b)$$

114 As noted above, we take the time origin to be the time of first intervention.

115 To determine the dynamic spread function, we reformulate Eq. (3a) as an equation for  $\delta(t)$ ,  
116 assuming  $T(t)$  and  $I(t)$  to be known. We then obtain the  $T(t)$  profile from the published number of  
117 new infections per day (Johns Hopkins Resource Center 2020) in the locale of interest (e.g. New  
118 York City). We label this published profile  $T_p(t)$  and the resulting (from Eq. (3b)) infection profile  
119  $I_p(t)$ , and we insert them into the equation for  $\delta(t)$ . The resulting equation for the dynamic spread  
120 function is:

$$121 \quad \frac{d\delta}{dt} = \frac{I_p}{T_p} \delta^2 + \left( \lambda + \frac{1}{T_p} \frac{dT_p}{dt} \right) \delta \quad (4)$$

122 Because the governing equation for  $\delta(t)$  is informed by the published  $T_p(t)$  profile, solving Eq's 3  
123 using this dynamic spread function will exactly reproduce the published  $T_p(t)$  curve. The utility of  
124  $\delta(t)$  derives from modifying it to model alternative intervention strategies and solving Eqs (1) to  
125 determine the modified infection rate. Modifications to account for protective strategies were  
126 performed in the following manner.

### 127 **2.3 Accounting for Protective Equipment**

128 We build upon a previously developed SIR model (Myers et al. 2016, Yan et al. 2018) that  
129 systematically accounts for the presence of protective equipment. Differentiating Eq. (1d) with  
130 respect to time yields

131

$$132 \quad \frac{d\delta}{dt} = \frac{\partial\delta}{\partial\tilde{\beta}} \frac{d\tilde{\beta}}{dt} + \frac{\partial\delta}{\partial\kappa} \frac{d\kappa}{dt} \quad (5)$$

133 Apportioning a fraction  $\epsilon_\kappa$  (e.g.  $1/2$ ) of the change in  $\delta$  to changes in droplet production, we set

$$134 \quad \epsilon_\kappa \frac{d\delta}{dt} = \frac{\partial\delta}{\partial\kappa} \frac{d\kappa}{dt} \quad (6)$$

135 Since from (1d)

$$136 \quad \frac{\partial\delta}{\partial\kappa} = \frac{\delta}{\kappa} \quad , \quad (7)$$

$$137 \quad \epsilon_\kappa \frac{d\delta}{dt} = \frac{\delta}{\kappa} \frac{d\kappa}{dt} \quad , \quad (8)$$

138 which can be integrated to

$$139 \quad \kappa(t) = \kappa(0) [\delta(t)/\delta(0)]^{\epsilon_\kappa} \quad . \quad (9)$$

140 In Myers et al (2016), it was shown that the production rate in the presence of protective  
141 equipment can be written as

$$142 \quad \kappa(t) = \kappa(0) [1 - FE * f_i(t)] \quad . \quad (10)$$

143 Here FE is the filtration efficiency (e.g. the FE for an N95 respirator is 95%) of the mask for the  
144 dominant droplet size, and  $f_i$  is the fraction of the infected population wearing the covering at any  
145 given time. To perform a retrospective analysis in which a barrier material of different capturing  
146 efficiency is investigated, the new FE value would be used in Eq. (10) which, with Eq. (9), would  
147 be used to create a new dynamic-spread function. The modified spread function would then used  
148 (in Eqs (3)) to estimate the change in infection rate.

149 To analyze scenarios where different fractions of the infected population deploy a given mask  
150 type, (9) and (10) can be combined to give

$$151 \quad [\delta(t)/\delta(0)]^{\epsilon\kappa} = 1 - FE * f_i(t) \quad , \quad (11)$$

152 and

$$153 \quad f_i(t) = \frac{1 - [\delta(t)/\delta(0)]^{\epsilon\kappa}}{FE} \quad (12)$$

154 Eq. (12) can be used to estimate the fraction of infected individuals deploying a mask of a given  
155 filtration efficiency for a baseline case (known  $\delta(t)$ ). The effect of different fractions of the  
156 infected population deploying the mask can be quantified by prescribing  $f_i(t)$ , solving for  $\delta(t)$ , and  
157 using this modified spread function in Equations (3).

## 158 **2.4 Solution Technique**

159 The initial conditions for Equations (3) are obtained by simulating the dynamics of the infection  
160 prior to any intervention, days 1 – 17 for CNYC. In that case, the derivative of the spread function



161 is zero and Equations (3a,b) revert to a traditional SIR model. Seeking solutions that have an  
162 exponential time dependence of the form  $exp(Mt)$  result in the algebraic equation

163

$$164 \quad 2 * M = -(\lambda + \gamma) \pm [(\lambda + \gamma)^2 + 4\delta_0]^{1/2} \quad . \quad (13)$$

165 The subscript “0” on  $\delta$  implies that the value applies to the initial period of the infection, before  
166 intervention occurs. The other parameters do not vary during the course of the epidemic and are  
167 not subscripted. An exponentially growing solution will occur when

$$168 \quad \frac{\delta_0}{\gamma\lambda} > 1 \quad (14)$$

169 The ratio  $\delta_0/(\gamma\lambda)$  is the reproduction number  $R_0$  (Myers et al. 2016) for the standard SIR model.  
170 The growth rate  $M$  can be obtained from infection rates published during the beginning of the  
171 infection. Estimates of the reproduction numbers  $R_0$  for the early stages of epidemics are also  
172 published. In the simulations, a range of recovery times  $\mu$  (dimensionless recovery times  $\gamma$ )  
173 ranging from 2 days to 10 days were considered. For any given value of  $\gamma$ ,  $\lambda$  and  $\delta_0$  were obtained  
174 from Eqs (13) and (14) and used in the solution of the dynamic equations (3). The initial value for  
175  $T(t)$  was obtained from the published profile  $T_p(t)$  (published number of new infections per day,  
176 Johns Hopkins Coronavirus Research Center, 2020), evaluated at day 17.  $I_p(t)$  was derived from  
177  $T_p(t)$  using Eq. (3b), rather than using a published infection profile, so that it was not necessary to  
178 ascertain how well recoveries were tabulated in the published infection curves. The  $I_p(t)$  function  
179 evaluated at day 17 was used to provide the initial condition for  $I(t)$ . Equations (3) were solved  
180 using a Runge-Kutta method (Matlab *ode45*, Mathworks Inc.).

### 181 **3. Results**

182 We performed a retrospective analysis of CNYC during days 17 - 37 . This interval was chosen  
183 because day 17 is the day of the first intervention (shelter in place), and day 37 is the time of  
184 maximum new infections per day, based upon a 7-day average (Johns Hopkins Coronavirus  
185 Research Center, 2020). Initial reproduction numbers between 2 and 10 were considered, along  
186 with recovery times between 2 days and 10 days. The fraction  $\epsilon_K$  was  $\frac{1}{2}$ . We analyzed scenarios  
187 where the infected population deployed different types of masks. For baseline, it was assumed  
188 that the FE was 67%. This value is representative of homemade masks (Howard et al. 2020),  
189 though the filtration capability of homemade masks spans a wide range. Higher-efficiency masks  
190 with FE's of 75%, 80%, and 90% were considered for the hypothetical scenarios. Uncertainty in  
191 the calculated results was obtained by performing simulations for different combinations of  
192 reproduction numbers and recovery rates and computing the mean and standard deviation for the  
193 ensemble of parameter combinations.

194 Figure 1a shows the dynamic spread function as a function of time. A sharp decrease is seen  
195 initially, owing to the shelter-in-place restriction. For larger FE, a sharper decrease in the spread  
196 function is observed. A marked decrease in new infections results from an increase in FE (Fig.  
197 1b). Increasing FE from 67% to 75% , for example, reduces the maximum number of new  
198 infections per day by about 40%, and decreases the turn-around time from 37 days to about 31  
199 days. The number of infected individuals (Fig. 1c) is reduced by about 30%. The uncertainty is  
200 considerably larger for the spread function (Fig 1a) and the infected population (Fig. 1c) than the  
201 number of new infections per day (Fig. 1b), as the spread function and infected population are

202 much more strongly influenced by the recovery time than the number of new infections. The  
203 recovery time was allowed to span a factor of 5.

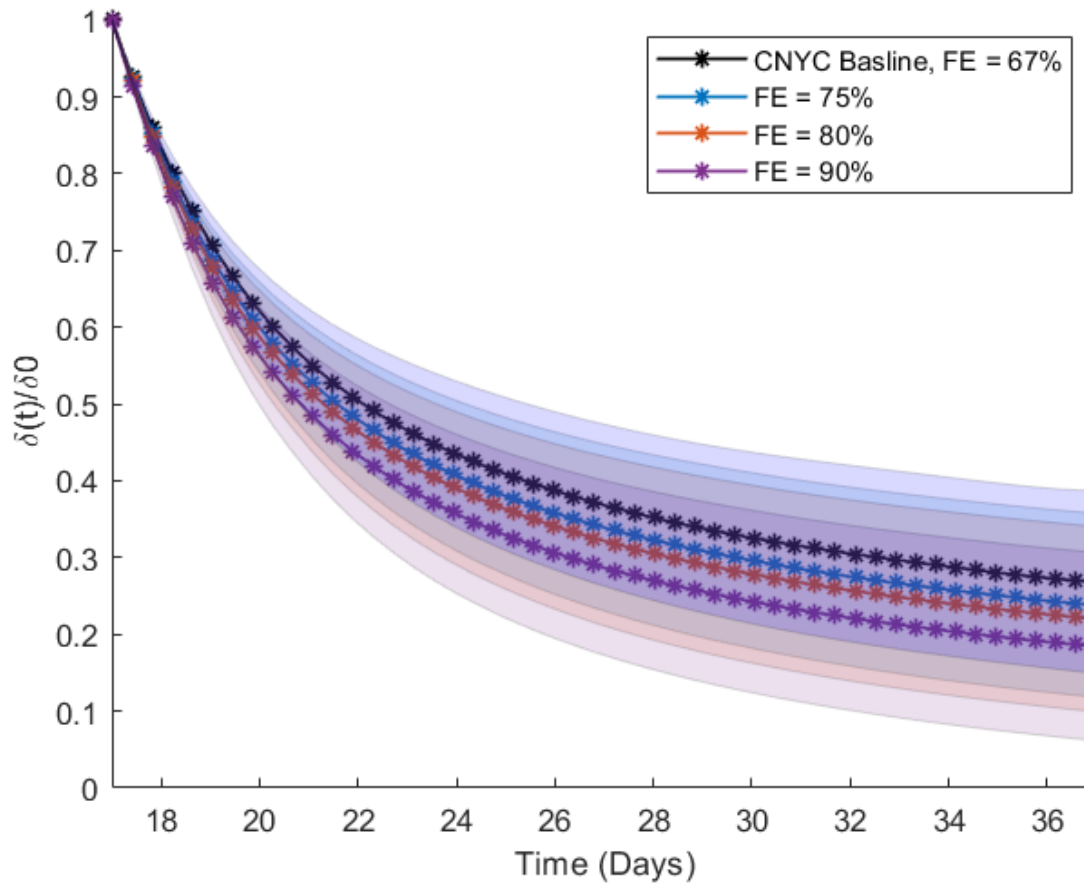

204

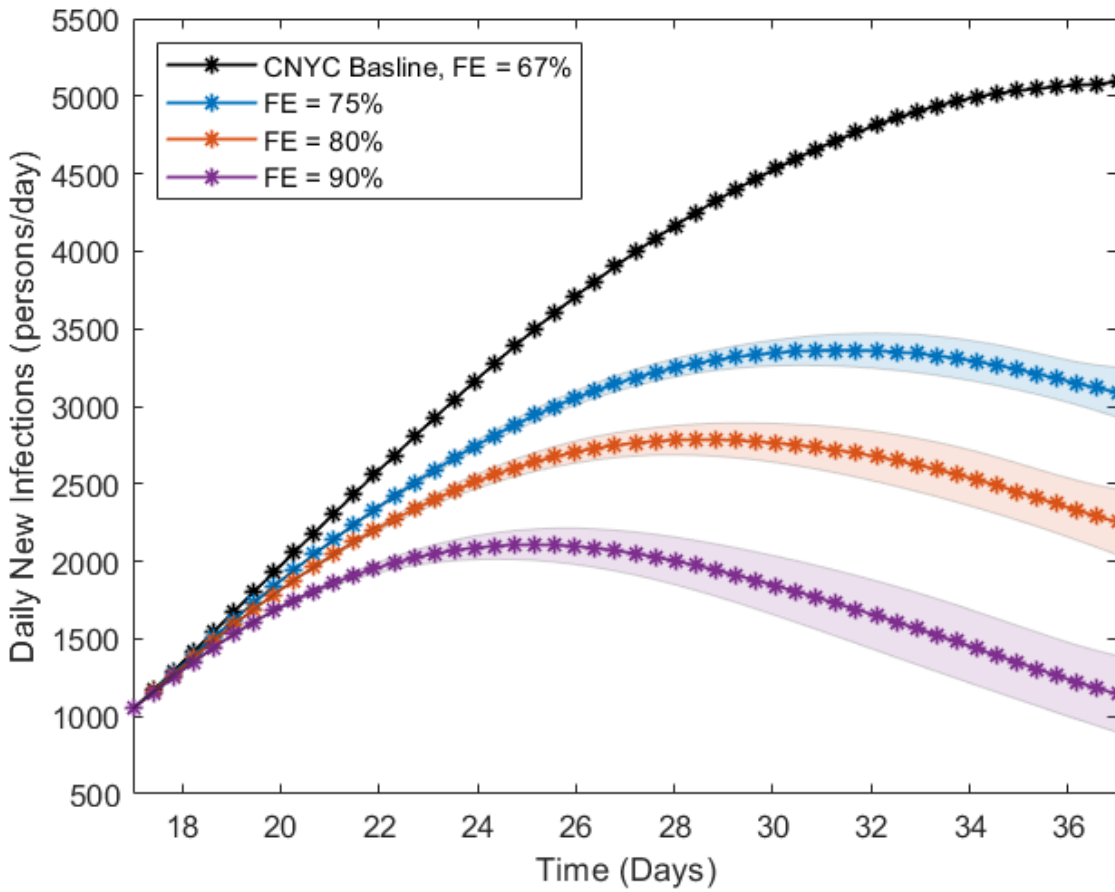

205

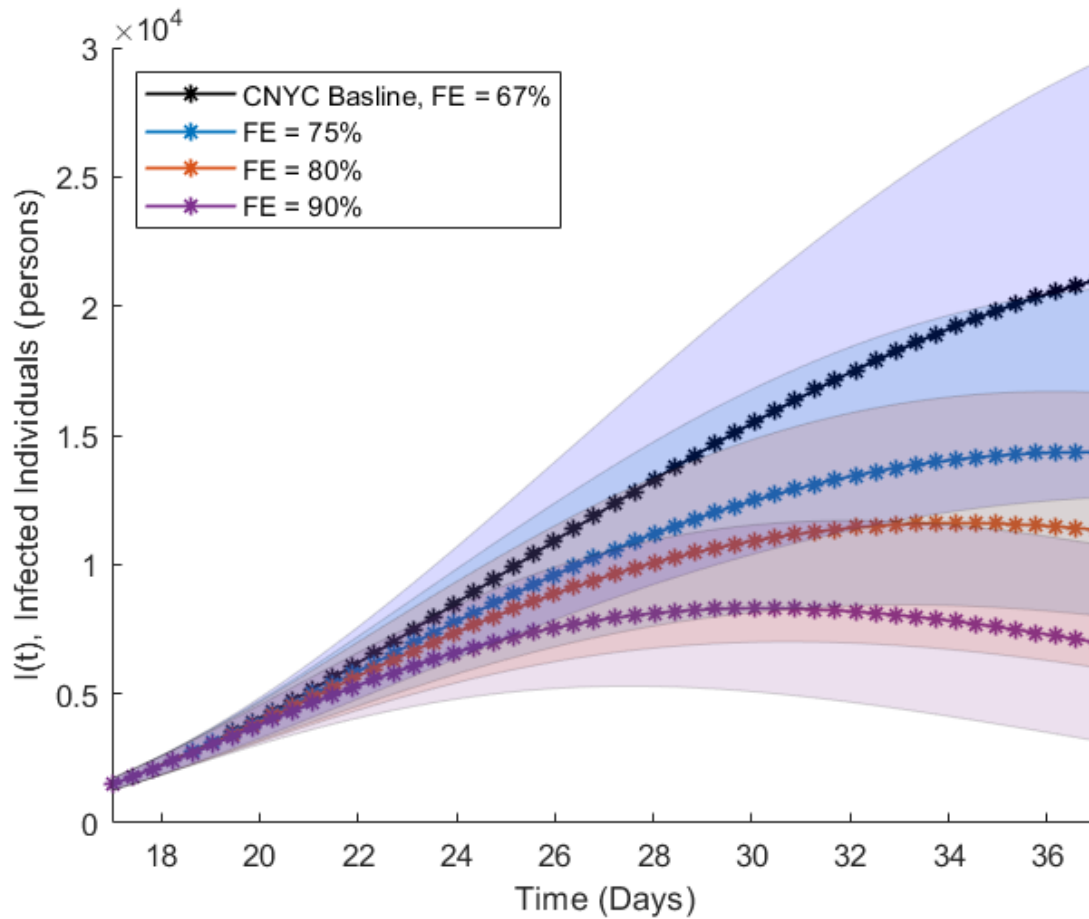

206

207 Figure 1. Dynamic spread function (1a), change in new infections (1b), and number of infections  
208 (1c), for CNYC with infected population deploying masks with different filtration efficiencies.

209 Shadowed regions denote values within a standard deviation of the mean.

210

211 An additional set of simulations was performed in which the fraction of the CNYC population  
212 wearing a mask (FE=67%) was increased, by 2%, 5%, and 10%. The baseline fraction was  
213 determined from Eq. (12), with  $\delta(t)$  (baseline curve in Fig. 1a) derived from Eq. (4). The fraction  
214 deploying masks increased from 0% at day 17 to roughly 75% on day 37. Increasing the fraction

215 by 10% (for all times) reduced the number of new infections per day from about 5100 to 3600  
216 (Fig. 2). The turn-around time is reduced from approximately 37 days to 32 days.

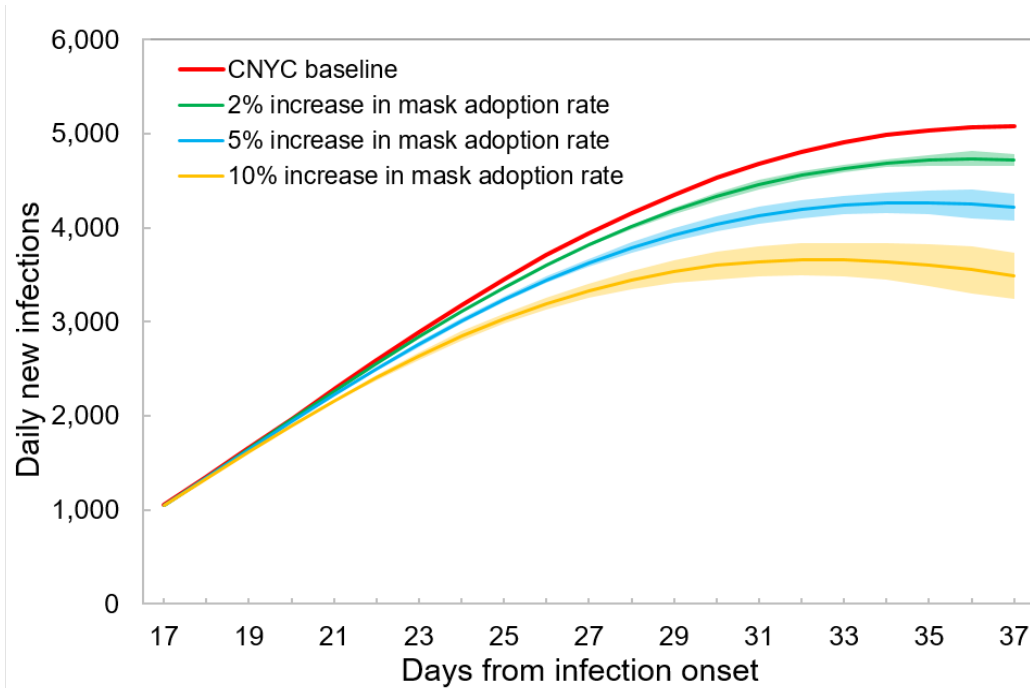

217  
218 Figure 2. Number of new infections per day for scenarios where various fractions of the infected  
219 population in CNYC deploy masks with a 67% filtration efficiency.

#### 220 4. Discussion

221 While days 17 to 37 were featured in our simulations, the dynamic-spread-function technique can  
222 be applied to any period where reliable numbers of new infections are available. Calibration of  
223 the model is based upon number of new infections, rather than the size of the infected population,  
224 to eliminate the uncertainty associated with how well recoveries are tracked in the calibration  
225 dataset.

226 Since the dynamic spread function is the product of the transmission rate times the droplet  
227 production rate, it quantifies the ability of the infection to spread. The ability of the infection to  
228 spread decreased rapidly from day 17 (Fig. 1a). Because adoption of masks in CNYC likely  
229 occurred on a continuous basis over the weeks succeeding day 17, the curves in Fig. 1a are smooth  
230 and monotonic. For more abrupt changes in behavior, the spread function need not be monotonic.

231 The salutary effects of protective equipment in CNYC were investigated without having to update  
232 the SIR parameters during the epidemic. The continuous adoption of masks would be difficult to  
233 simulate by updating coefficients in standard SIR models. With the dynamic-spread approach, the  
234 gradual adoption of masks is captured very naturally.

235 The dynamic-spread approach also allowed other behaviors affecting the infection dynamics, such  
236 as social distancing, to be captured without being specifically modeled. The pattern of social  
237 distancing in CNYC was retained for all the simulated scenarios involving different facemasks.

238 This commonality is largely responsible for the similar shapes of the curves in Fig. 1a. The only  
239 decision made relative to social distancing was that the factors contained in the transmission rate  
240 ( $\tilde{\beta}$ ), which includes social distancing (Myers et al. 2016), were responsible for roughly half ( $\epsilon_{\kappa} =$   
241  $\frac{1}{2}$ ) of the reduction in the spread function (shown in Fig. 1a). Other fractions would result in  
242 different numbers in Figs 1 and 2, with higher values of  $\epsilon_{\kappa}$  resulting in larger reductions in  
243 infection rate, and vice versa.

244 The simulated scenarios addressed only changes in masks worn by the infected population. No  
245 change in protection for the susceptible population was assumed. The susceptible population  
246 deployed masks, but the type was not varied between scenarios. As shown in Myers et al. (2016),

247 the effect of mask deployment by the susceptible population can be simulated by modifying the  
248 transmission term ( $\tilde{\beta}(t)$ ) in Eq. (3), using equations analogous to (9) and (10).

249 For the conditions of the simulations, a slight increase in facemask efficiency resulted in a larger  
250 benefit than a commensurate increase in compliance. At day 37, for example, a fractional increase  
251 in compliance of 0.1 resulted in a reduction in new infections of about 1500 per day (Fig. 2), while  
252 a fractional increase in FE of 0.1 reduced the number of new infections by over 2000  
253 (interpolating Fig. 1b). For a higher baseline FE than 67%, increasing the compliance rate would  
254 produce a larger decrease in new infections. This comparison between filter efficiency and  
255 population compliance illustrates the utility of the model for determining how resources devoted  
256 to countermeasures can be optimally spent. In this case, the model can help inform the choice  
257 between 1) producing and distributing barriers of higher FE compared, and 2) educating and  
258 incentivizing the population to deploy barriers more readily available.

259 A noteworthy conclusion emerging from the simulations is that considerable benefit can be  
260 obtained from higher FE masks without requiring N95 levels of efficiency (Fig 1). It is important  
261 to emphasize that for the benefits to be realized, the filtration efficiencies for the barrier material  
262 must be attainable for the particle-size range of the dominant transmission mode for the given  
263 scenario. One way of assuring this is for the barrier to provide the given FE across the spectrum  
264 of particle sizes. Otherwise, knowledge of the material filtration efficiency for the intended  
265 application (e.g. reducing airborne particulates generated by coughing or sneezing by infected  
266 persons indoors) is required in order to generate useful estimates. The complex issues of  
267 dominant transmission mode for COVID-19, and the filtration efficiency of different masks  
268 designs for the different modes, will be addressed in future applications of the model.



269

270 **References**

271 Bertozzi A L, Franco E, Mohlerd G, Shorte M B & Sledge D. The challenges of modeling and  
272 forecasting the spread of COVID-19. *Proc. Nat. Acad. Sci* **117**, 16732–16738 (2020).

273 Cooper, I, Mondal A, & Antonopoulos C. A SIR model assumption for the spread of COVID-19  
274 in different communities. *Chaos, Solitons, and Fractals*, 2020. doi:10.1016/j.chaos.2020.110057

275 Giordano G, Blanchini F, Bruno R, Colaneri P, Di Filippo A, Di Matteo A & Colaneri M.  
276 Modelling the COVID-19 epidemic and implementation of population-wide interventions in Italy.  
277 *Nature Medicine Let.* doi:10.1038/s41591-020-0883-7

278

279 Howard J, Huang A, Lik Z, et al., Face Masks Against COVID-19: An Evidence Review. *Proc.*  
280 *Nat. Acad. Sci. U.S.A.* (2020).DOI: 10.20944/preprints202004.0203.v2

281 Johns Hopkins Coronavirus Resource Center (2020) <https://coronavirus.jhu.edu/map.html>.

282 Myers M, Yan J, Hariharan P, Guha S. A Mathematical Model for Assessing the Effectiveness of  
283 Protective Devices in Reducing Risk of Infection by Inhalable Droplets. *Mathematical Medicine*  
284 *and Biology*, October 2016, <https://doi.org/10.1093/imammb/dqw018> .

285

286 Siegenfeld A F, Taleb N N & Bar-Yam Y. What models can and cannot tell us about COVID-19.  
287 *Proc. Nat. Acad. Sci. U.S.A.* **117**, 16092-16095 (2020).

- 288 Stilianakis N I & Drossinos Y. Dynamics of infectious disease transmission by inhalable  
289 respiratory droplets. *J. Royal Society Interface* 7, 1355–1366 (2010).
- 290 Stutt R O J H, Retkute R, Bradley B, Gilligan C A & Colvin J. A modelling framework to assess  
291 the likely effectiveness of facemasks in combination with ‘lock-down’ in managing the COVID-  
292 19 pandemic. *Proc. R. Soc.A* **476**: 20200376. [doi:10.1098/rspa.2020.0376](https://doi.org/10.1098/rspa.2020.0376)
- 293 Yan J, Hariharan P, Guha S, Myers M. Modeling the effectiveness of respiratory protective  
294 devices in reducing influenza outbreak. *Risk Analysis*, September 2018. [doi:10.1111/risa.13181](https://doi.org/10.1111/risa.13181) .
